# Supplementary material for: The Mechanism of Toxicity in HET-S/HET-s Prion Incompatibility
Source: PubMed Central journal article supplement (PMC3531502; doi:10.1371/journal.pbio.1001451), 2012-12-27

Figure S1

A

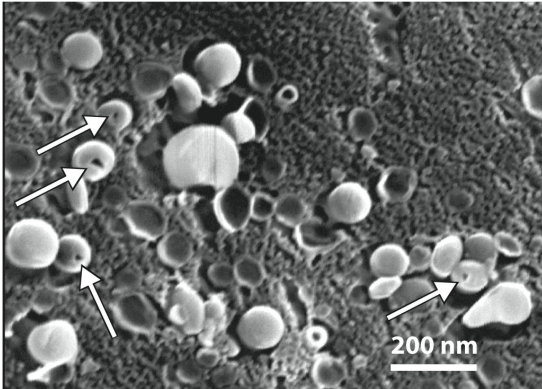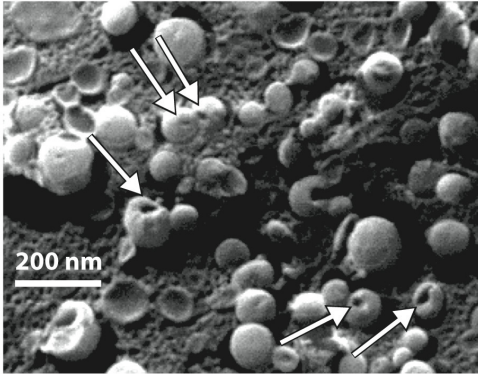

B

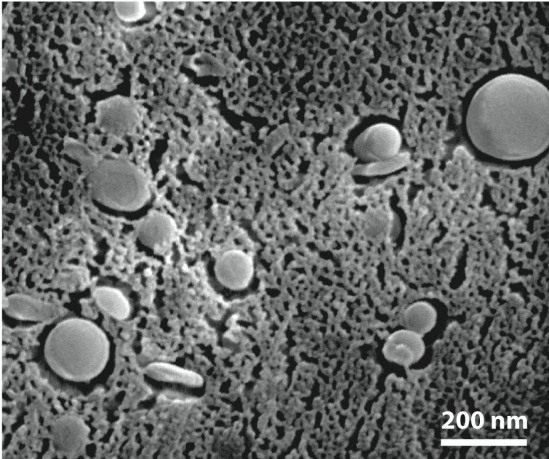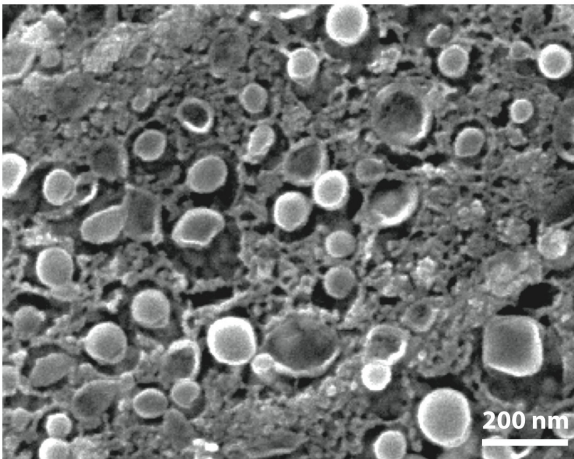

Supplement: pbio.1001451.s001.pdf [file pbio.1001451.s001.pdf]
