# Supplementary material for: The Mechanism of Toxicity in HET-S/HET-s Prion Incompatibility
Source: PubMed Central journal article supplement (PMC3531502; doi:10.1371/journal.pbio.1001451), 2012-12-27
Supplement: pbio.1001451.s004.pdf [file pbio.1001451.s004.pdf]

Figure S4

|       |                                                                                                     |     |
|-------|-----------------------------------------------------------------------------------------------------|-----|
| HET-S | MSEPF <del>E</del> IVAGALGVAGLFN <del>N</del> CVACFEYVQLGRHFGRDYERCQLRLDIAKVRLSRWGEAVQ              | 60  |
| HET-s | MSEPF <del>G</del> IVAGALNVAGLFN <del>N</del> CVDCFEYVQLGRPFGRDYERCQLRLDIAKARLSRWGEAVK              | 60  |
|       |                                                                                                     |     |
| HET-S | INDDPRFHSSAP <del>I</del> DKSVQLAKSIVEEILLFESAQKTSKRYELVADQQDLVVFEDKDMKP                            | 120 |
| HET-s | INDDPRFHSSAP <del>T</del> DKSVQLAKSIVEEILLFESAQKTSKRYELVADQQDLVVFEDKDMKP                            | 120 |
|       |                                                                                                     |     |
| HET-S | IGRALHRRLLKDLVSRRQKQTS <del>L</del> AKKTAWALYDGKSLEKIVDQVAGFVDELEKAFPIEAVC                          | 180 |
| HET-s | IGRALHRRLL <del>N</del> DLVSRRQKQTS <del>L</del> AKKTAWALYDGKSLEKIVDQVARFVDELEKAFPIEAVC             | 180 |
|       |                                                                                                     |     |
| HET-S | HKLAENEIEEVEDEASLTILKDAAGGIDAAMS <del>D</del> AAAQKIDAI <del>V</del> GRNSAKDIRTEKRARVQ              | 240 |
| HET-s | HKLAE <del>I</del> EIEEVEDEASLTILKDAAGGIDAAMS <del>D</del> AAAQKIDAI <del>V</del> GRNSAKDIRTEERARVQ | 240 |
|       |                                                                                                     |     |
| HET-S | LGNVVTAALHGEIRISDQTTNSVETVVGKGESKVLIGNEYGGKGFWDN                                                    | 289 |
| HET-s | <u>LGNVVTAALHGGIRISDQTTNSVETVVGKGESRVLIGNEYGGKGFWDN</u>                                             | 289 |
