# Supplementary material for: The Mechanism of Toxicity in HET-S/HET-s Prion Incompatibility
Source: PubMed Central journal article supplement (PMC3531502; doi:10.1371/journal.pbio.1001451), 2012-12-27
Supplement: pbio.1001451.s005.pdf [file pbio.1001451.s005.pdf]

**Table S1** HET-S/s variant phenotype correlation to calcein leakage and TM prediction.

| Genotype                   | <i>het-S</i> | <i>het-S</i><br>(A23D)             | <i>het-S</i><br>(H33P) | <i>het-s</i> | <i>het-s</i><br>(D23A,H33P) |
|----------------------------|--------------|------------------------------------|------------------------|--------------|-----------------------------|
| Phenotype                  | [Het-S]      | [Het-S <sup>s</sup> ] <sup>1</sup> | [Het-s]                | [Het-s]      | [Het-S]                     |
| TM prediction <sup>2</sup> | +            | -                                  | +                      | -            | +                           |
| Calcein leakage            | +            | -                                  | -                      | -            | +                           |

<sup>1</sup> This phenotype is an unstable [Het-S] that spontaneously or after contact with [Het-s] converts to [Het-s][1].

<sup>2</sup> Results of the TMHMM algorithm predictions for residues 1-38 of the proteins.

## References

1. Deleu C, Clave C, Begueret J (1993) A single amino acid difference is sufficient to elicit vegetative incompatibility in the fungus *Podospora anserina*. *Genetics* 135: 45-52.
