# Supplementary material for: The Mechanism of Toxicity in HET-S/HET-s Prion Incompatibility
Source: PLoS Biol. 2012 Dec 27;10(12):e1001451. doi: 10.1371/journal.pbio.1001451 (PMC3531502; doi:10.1371/journal.pbio.1001451)
Supplement: Table S2 — Experimental parameters of the solid-state NMR spectra. Their pulse sequences are given in [26]. The DREAM transfer is described in [59]. (PDF) [file pbio.1001451.s006.pdf]

**Table S2** Experimental parameters of the solid-state NMR spectra.<sup>1</sup>

| Sample        | HET-s(218-289) fibril | HET-s(218-289) monomer + [13C,15N] HET-S monomer | HET-s(218-289) seeds + [13C,15N] HET-S monomer | HET-s monomer + [13C,15N] HET-S monomer | 15N HET-s(218-289) monomer + 13C HET-S monomer |
|---------------|-----------------------|--------------------------------------------------|------------------------------------------------|-----------------------------------------|------------------------------------------------|
| Spectrum      | NCA                   | NCA                                              | NCA                                            | NCA                                     | PAIN                                           |
| Reference     | Fig. 4A,B,C           | Fig. 4A                                          | Fig. 4B                                        | Fig. 4C                                 | Fig. 4D                                        |
| 1H freq.      | 850 MHz               | 850 MHz                                          | 850 MHz                                        | 850 MHz                                 | 850 MHz                                        |
| MAS rate      | 18 kHz                | 17 kHz                                           | 18 kHz                                         | 17.5 kHz                                | 17 kHz                                         |
| t1 max        | 10 ms                 | 10 ms                                            | 10 ms                                          | 8 ms                                    | 9 ms                                           |
| t2 max        | 10 ms                 | 5 ms                                             | 12 ms                                          | 8 ms                                    | 12 ms                                          |
| 1H decoupling | 100 kHz               | 100 kHz                                          | 100 kHz                                        | 100 kHz                                 | 100 kHz                                        |
| mixing 1      | 4 ms                  | 3.5 ms                                           | 4 ms                                           | 4 ms                                    | 8 ms                                           |

| Sample        | HET-s(218-289) monomer + [13C,15N] HET-S monomer | HET-s(218-289) monomer + [13C,15N] HET-S monomer | HET-s(218-289) monomer + [13C,15N] HET-S monomer |
|---------------|--------------------------------------------------|--------------------------------------------------|--------------------------------------------------|
| Spectrum      | NCACB                                            | CANCO                                            | NCOCX                                            |
| 1H freq.      | 850 MHz                                          | 850 MHz                                          | 850 MHz                                          |
| MAS rate      | 17 kHz                                           | 18 kHz                                           | 18 kHz                                           |
| t1 max        | 10 ms                                            | 5.5 ms                                           | 9.6 ms                                           |
| t2 max        | 5 ms                                             | 9.6 ms                                           | 6.5 ms                                           |
| t3 max        | 10 ms                                            | 10 ms                                            | 10 ms                                            |
| 1H decoupling | 100 kHz                                          | 100 kHz                                          | 100 kHz                                          |
| mixing 1      | 3.5 ms CP                                        | 3.5 ms CP                                        | 4 ms CP                                          |
| mixing 2      | 1.2 ms DREAM                                     | 4 ms CP                                          | 50 ms DARR                                       |

<sup>1</sup> Pulse sequences are given in [1]. The DREAM transfer is described in [2].

## References

- Schuetz A, Wasmer C, Habenstein B, Verel R, Greenwald J, et al. (2010) Protocols for the sequential solid-state NMR spectroscopic assignment of a uniformly labeled 25 kDa protein: HET-s(1-227). *Chembiochem* 11: 1543-1551.
- Verel R, Ernst M, Meier BH (2001) Adiabatic dipolar recoupling in solid-state NMR: the DREAM scheme. *J Magn Reson* 150: 81-99.
